# Supplementary material for: Absence of Ataxin-3 Leads to Enhanced Stress Response in C. elegans
Source: PubMed Central journal article supplement (PMC3079722; doi:10.1371/journal.pone.0018512), 2011-04-19
Supplement: pone.0018512.s001.pdf [file pone.0018512.s001.pdf]

**Table S1**

|           | Strain                     | n   | Mean survival<br>(hours) | p value               |
|-----------|----------------------------|-----|--------------------------|-----------------------|
| <b>1A</b> | N2                         | 140 | 9                        |                       |
|           | <i>atx-3(gk193)</i>        | 70  | 10                       | < 0.0001              |
|           | <i>atx-3(tm1689)</i>       | 70  | 10                       | < 0.0001              |
|           | <i>daf-2(e1370)</i>        | 39  | nd*                      |                       |
| <b>1B</b> | N2                         | 40  | 12.5                     | < 0.0001              |
|           | <i>atx-3(gk193)</i>        | 49  | 17                       | < 0.0001              |
| <b>1C</b> | N2                         | 70  | 9                        |                       |
|           | <i>atx-3(gk193)</i>        | 70  | 10                       | < 0.0001              |
|           | N2 pre-HS                  | 85  | 10                       | < 0.0001 <sup>+</sup> |
|           | <i>atx-3(gk193)</i> pre-HS | 91  | 14                       | < 0.0001              |
| <b>1D</b> | N2                         | 70  | 9                        |                       |
|           | <i>atx-3(gk193)</i>        | 71  | 10                       | < 0.0001              |
|           | N2 pre-HS                  | 70  | 13                       | < 0.0001 <sup>+</sup> |
|           | <i>atx-3(gk193)</i> pre-HS | 69  | 15                       | < 0.0001              |
| <b>1E</b> | N2                         | 40  | 12.5                     |                       |
|           | <i>atx-3(gk193)</i>        | 49  | 17                       | < 0.0001              |
|           | N2 pre-HS                  | 62  | 18                       | < 0.0001 <sup>+</sup> |
|           | <i>atx-3(gk193)</i> pre-HS | 51  | 22                       | < 0.0001              |
| <b>1F</b> | N2                         | 40  | 12.5                     |                       |
|           | <i>atx-3(gk193)</i>        | 49  | 17                       | < 0.0001              |
|           | N2 pre-HS                  | 45  | 17                       | < 0.0001 <sup>+</sup> |
|           | <i>atx-3(gk193)</i> pre-HS | 53  | 20                       | 0.05                  |

\* *not determined.*

<sup>+</sup>*compared to N2 without pre-HS*

p values for *atx-3(gk193)* pre-HS are obtained from comparison with N2 pre-HS
