# Supplementary material for: Absence of Ataxin-3 Leads to Enhanced Stress Response in C. elegans
Source: PubMed Central journal article supplement (PMC3079722; doi:10.1371/journal.pone.0018512), 2011-04-19
Supplement: pone.0018512.s003.pdf [file pone.0018512.s003.pdf]

**Table S3**

|           | Strain                               | n   | Mean survival<br>(hours) | p value              |
|-----------|--------------------------------------|-----|--------------------------|----------------------|
| <b>7C</b> | N2                                   | 22  | 12.5                     |                      |
|           | <i>atx-3(gk193)</i>                  | 40  | 17                       | <0.0001              |
|           | <i>daf-16(mu86)</i>                  | 28  | 13                       | 0.5924               |
|           | <i>gk193;mu86</i>                    | 47  | 13                       | 0.4253 <sup>+</sup>  |
|           | <i>daf-2(e1370)</i>                  | 50  | nd*                      |                      |
| <b>7D</b> | N2                                   | 49  | 17                       |                      |
|           | <i>atx-3(gk193)</i>                  | 37  | 19                       | 0.0014               |
|           | <i>daf-16(mu86)</i>                  | 51  | 16                       | 0.7899               |
|           | <i>gk193;mu86</i>                    | 22  | 17                       | 0.2199 <sup>+</sup>  |
|           | <i>daf-2(e1370)</i>                  | 49  | nd*                      |                      |
| <b>7E</b> | <i>daf-16</i> rescue + <i>l 4440</i> | 140 | 14                       |                      |
|           | <i>daf-16</i> rescue + RNAi(ATX-3)   | 202 | 16                       | <0.0001              |
| <b>7F</b> | N2 + L4440                           | 157 | 21                       |                      |
|           | <i>atx-3(gk193)</i> + L4440          | 126 | 23                       | <0.0001              |
|           | N2 + RNAi(HSP-16.2)                  | 151 | 19                       | 0.04                 |
|           | <i>atx-3(gk193)</i> + RNAi(HSP-16.2) | 132 | 17                       | <0.0001 <sup>∇</sup> |
| <b>7G</b> | N2 + L4440                           | 152 | 14                       |                      |
|           | <i>atx-3(gk193)</i> + L4440          | 87  | 16                       | <0.0001              |
|           | N2 + RNAi(C12C8.1)                   | 137 | 14                       | 0.0086               |
|           | <i>atx-3(gk193)</i> + RNAi(C12C8.1)  | 111 | 14                       | 0.0035 <sup>⊗</sup>  |
| <b>7H</b> | N2 + L4440                           | 91  | 13                       |                      |
|           | <i>atx-3(gk193)</i> + L4440          | 42  | 15                       | 0.0004               |
|           | N2 + RNAi(F44E5.5)                   | 133 | 13                       | 0.19                 |
|           | <i>atx-3(gk193)</i> + RNAi(F44E5.5)  | 115 | 13                       | 0.4021 <sup>#</sup>  |

<sup>+</sup>compared to single mutant *daf-16(mu86)*

<sup>∇</sup>compared to N2 in RNAi(HSP-16.2)

<sup>⊗</sup>compared to N2 in RNAi(C12C8.1)

<sup>#</sup>compared to N2 in RNAi(F44E5.5)
