# Supplementary material for: Absence of Ataxin-3 Leads to Enhanced Stress Response in C. elegans
Source: PubMed Central journal article supplement (PMC3079722; doi:10.1371/journal.pone.0018512), 2011-04-19
Supplement: pone.0018512.s004.pdf [file pone.0018512.s004.pdf]

**Table S4**

| <b>Gene</b> | <b>Primer name</b> | <b>Sequence</b>                       |
|-------------|--------------------|---------------------------------------|
| HSP-4       | HSP-4_F            | TGACTCGTGCCAAGTTTGAG                  |
|             | HSP-4_R            | GTCCTTGCCGTTGAAGTAG                   |
| HSP-16.1    | HSP-16.1_F         | GTCACTTTACCACTATTTCCGTCCAGCTCAACGTTCC |
|             | HSP-16.1_R         | CAACGGGCGCTTGCTGAATTGGAATAGATCTTCC    |
| HSP-16.2    | HSP-16.2_F         | TTGCCATCAATCTCAACGTC                  |
|             | HSP-16.2_R         | CTTTCTTTGGCGCTTCAATC                  |
| HSP-16.49   | HSP-16.49_F        | GTCATGCTCCGTTCTCCATATTCTGATTCAAATGC   |
|             | HSP-16.49_R        | GCAACAAAATTGATCGGAATAGAACGTGATGAG     |
| F44E5.4     | F44E5.4_F          | CGTTTCGAAGAAGTGTGTGCTGATCTATTCCGG     |
|             | F44E5.4_R          | TTAATCAACTTCCTCAACAGTAGGTCCTTGTGG     |
| C12C8.1     | C12C8.1_F          | GCTGATCTTTTCCGCAAGAC                  |
|             | C12C8.1_R          | CCAAAGGCTACTGCTTCGTC                  |
| ACT-1       | ACT-1F             | GTCGGTATGGGACAGAAGGA                  |
|             | ACT-1R             | GCTTCAGTGAGGAGGACTGG                  |
| HPRT-1      | HPRT-1_F           | TCCAACCTCGTGCTGTCATTC                 |
|             | HPRT-1_R           | CGATTGGTTTGTTCGATT                    |
| ATX-3       | ATX-3_F            | GAAAATCCTGCGATGGTGGGA                 |
|             | ATX-3_R            | ACTTTTGGCGGTACAACCTGG                 |
| MTL-1       | MTL-1_F            | ATGGCTTGCAAGTGTGACTG                  |
|             | MTL-1_R            | CACATTTGTCTCCGCACTTG                  |
| SOD-3       | SOD-3_F            | CCAACCAGCGCTGAAATTCAATGG              |
|             | SOD-3_R            | GGAACCGAAGTCGCGCTTAATAGT              |
