# Supplementary material for: Absence of Ataxin-3 Leads to Enhanced Stress Response in C. elegans
Source: PubMed Central journal article supplement (PMC3079722; doi:10.1371/journal.pone.0018512), 2011-04-19

Figure S1

A

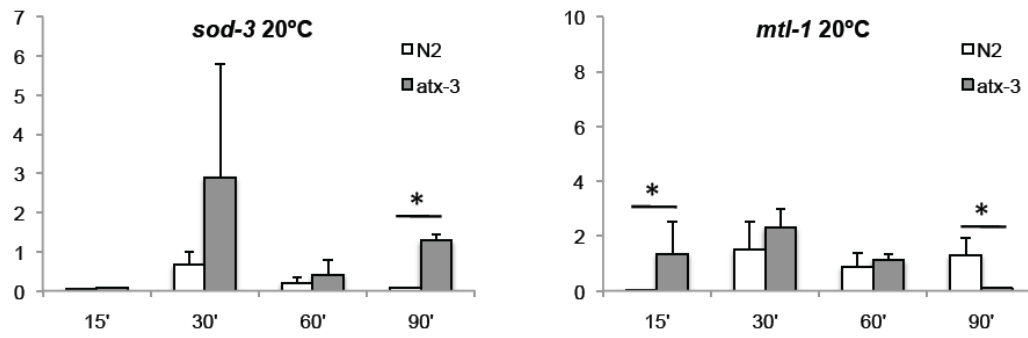

B

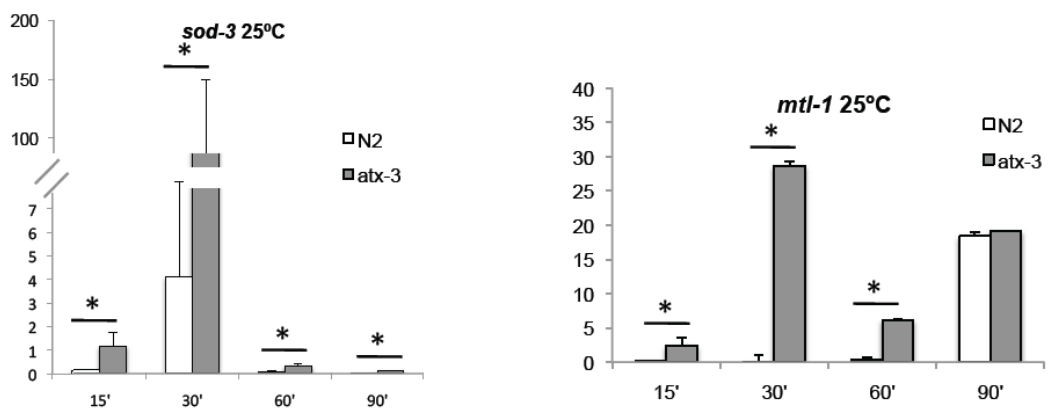

Supplement: pone.0018512.s005.pdf [file pone.0018512.s005.pdf]
